# Supplementary material
Source: PubMed Central journal article supplement (PMC9532360)

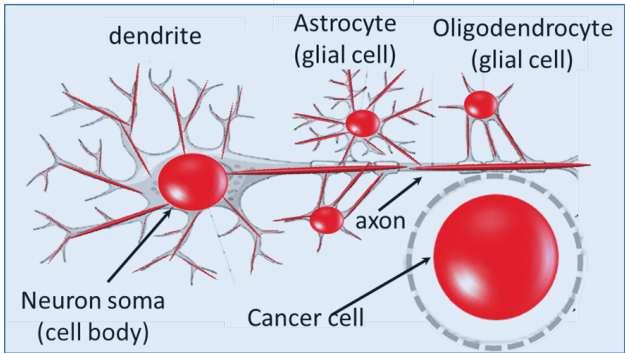

 dendrite, axon, ...

 Cell body of neurons and glia

 Cancer cell

Supplement: NIHMS1827204-supplement-1.pdf [file NIHMS1827204-supplement-1.pdf]

N=6

N=12

N=18

N=24

N=30

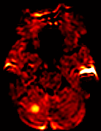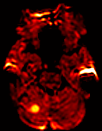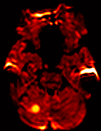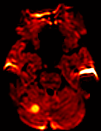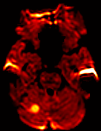

Supplement: NIHMS1827204-supplement-3.pdf [file NIHMS1827204-supplement-3.pdf]

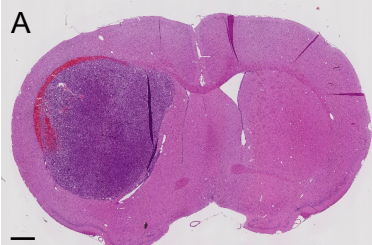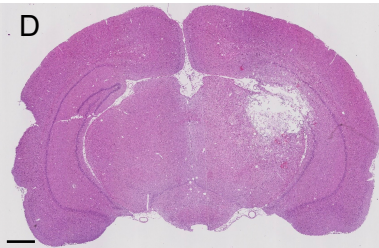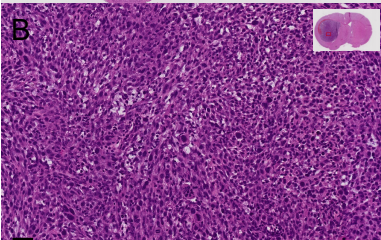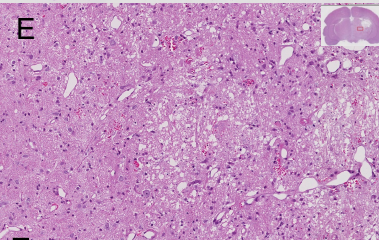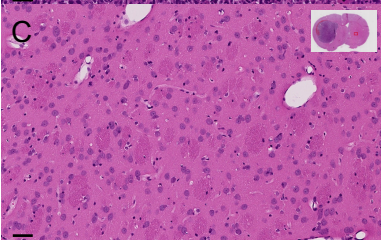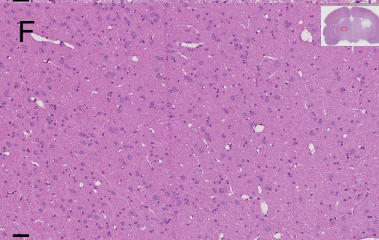

Supplement: NIHMS1827204-supplement-4.pdf [file NIHMS1827204-supplement-4.pdf]

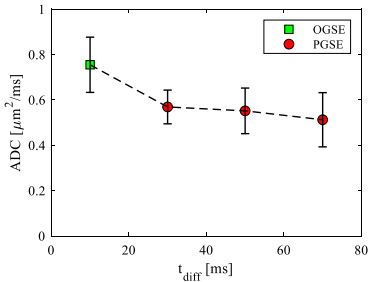

Supplement: NIHMS1827204-supplement-5.pdf [file NIHMS1827204-supplement-5.pdf]
